# Supplementary material for: A high performance fiber-shaped PEDOT@MnO2//C@Fe3O4asymmetric supercapacitor for wearable electronics
Source: Royal Society of Chemistry journal article supplement (doi:10.1039/c6ta05898a), 2016-01-01
Supplement: c6ta05898a1.pdf [file c6ta05898a1.pdf]

## Supporting Information

### High performance fiber-shaped PEDOT@MnO<sub>2</sub>//C@Fe<sub>3</sub>O<sub>4</sub> asymmetric supercapacitor for wearable electronics

*Jinfeng Sun<sup>1</sup>, Yan Huang<sup>2</sup>, Chenxi Fu<sup>2</sup>, Yang Huang<sup>2</sup>, Minshen Zhu<sup>2</sup>, Xiaoming Tao<sup>1, \*</sup>*

*Chunyi Zhi<sup>2, 3, \*</sup>, Hong Hu<sup>1, \*</sup>*

<sup>1</sup>Institute of Textiles and Clothing, The Hong Kong Polytechnic University, 11 Hong Chong Road, Hong Kong, China.

<sup>2</sup>Department of Physics and Materials Science, City University of Hong Kong, 83 Tat Chee Avenue, Hong Kong, China.

<sup>3</sup>Shenzhen Research Institute, City University of Hong Kong, Shenzhen 518000, China.

\*Correspondence and requests for materials should be addressed to H. H. (email: hu.hong@polyu.edu.hk) or to C.Z. (email: cy.zhi@cityu.edu.hk).

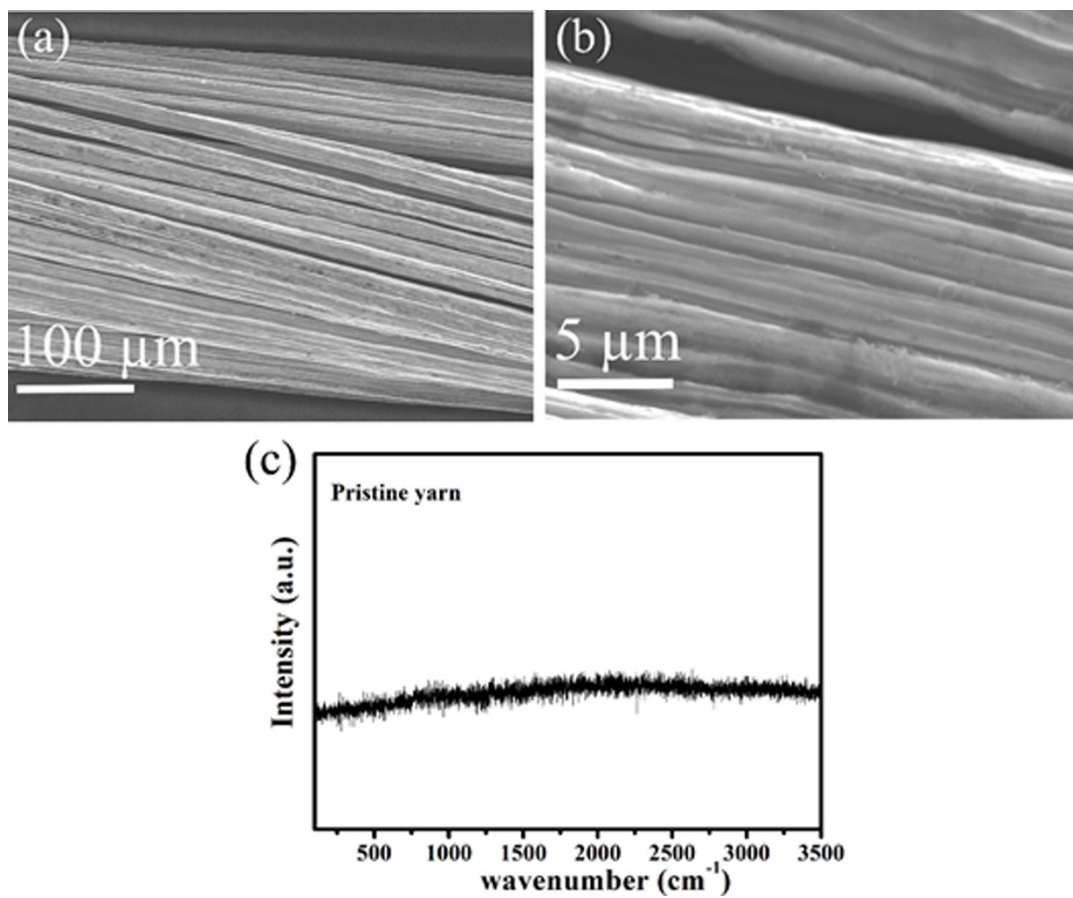

Figure S1 (a) and (b) SEM images of the pristine yarn. (c) Raman spectra of the pristine yarn.

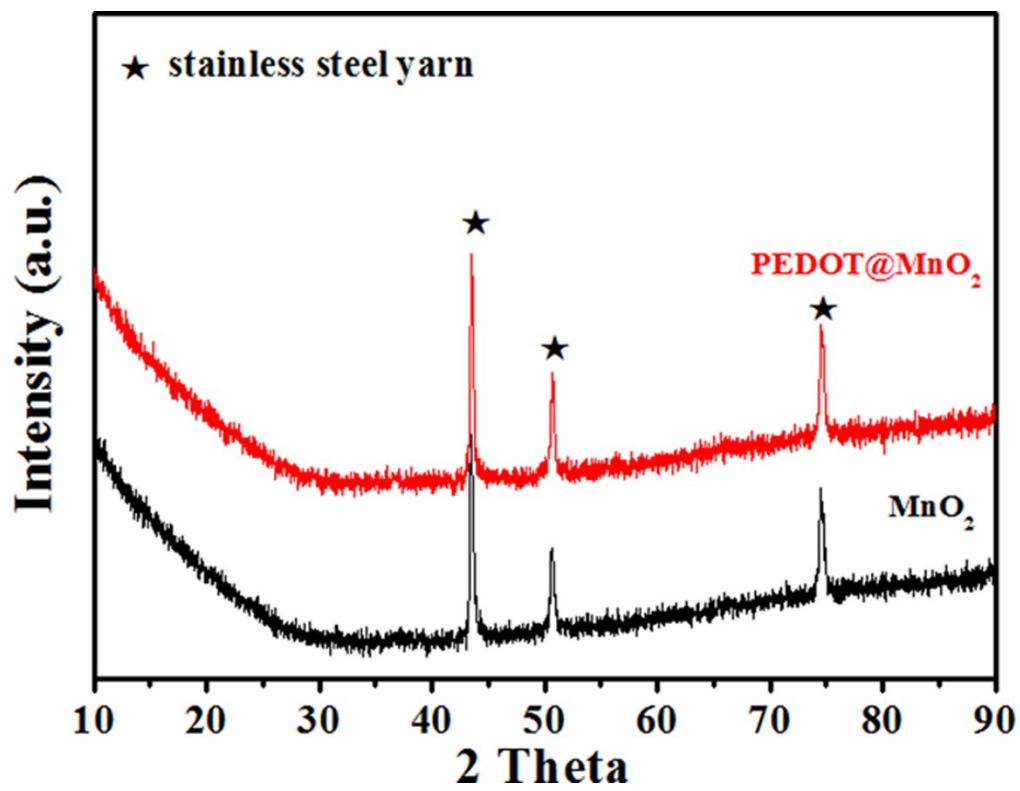

Figure S2 XRD patterns of MnO<sub>2</sub> and PEDOT@MnO<sub>2</sub>.

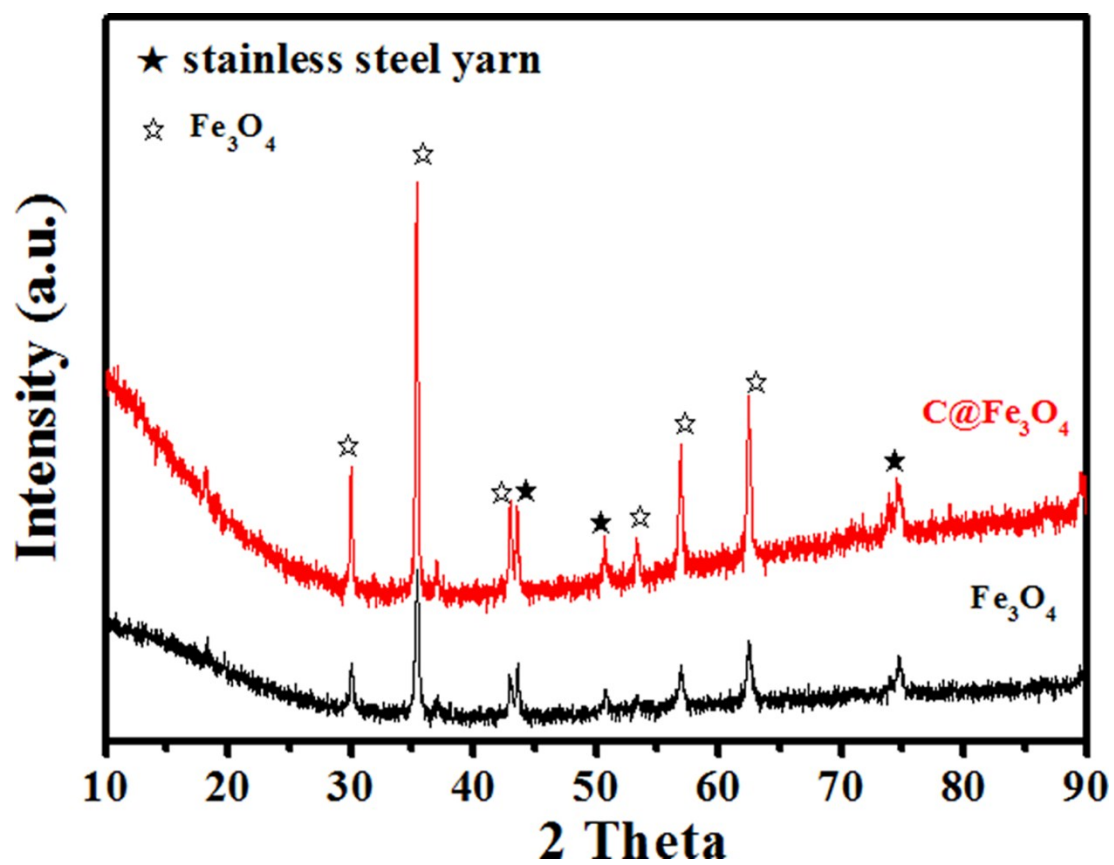

Figure S3 XRD patterns of Fe<sub>3</sub>O<sub>4</sub> and C@Fe<sub>3</sub>O<sub>4</sub>.

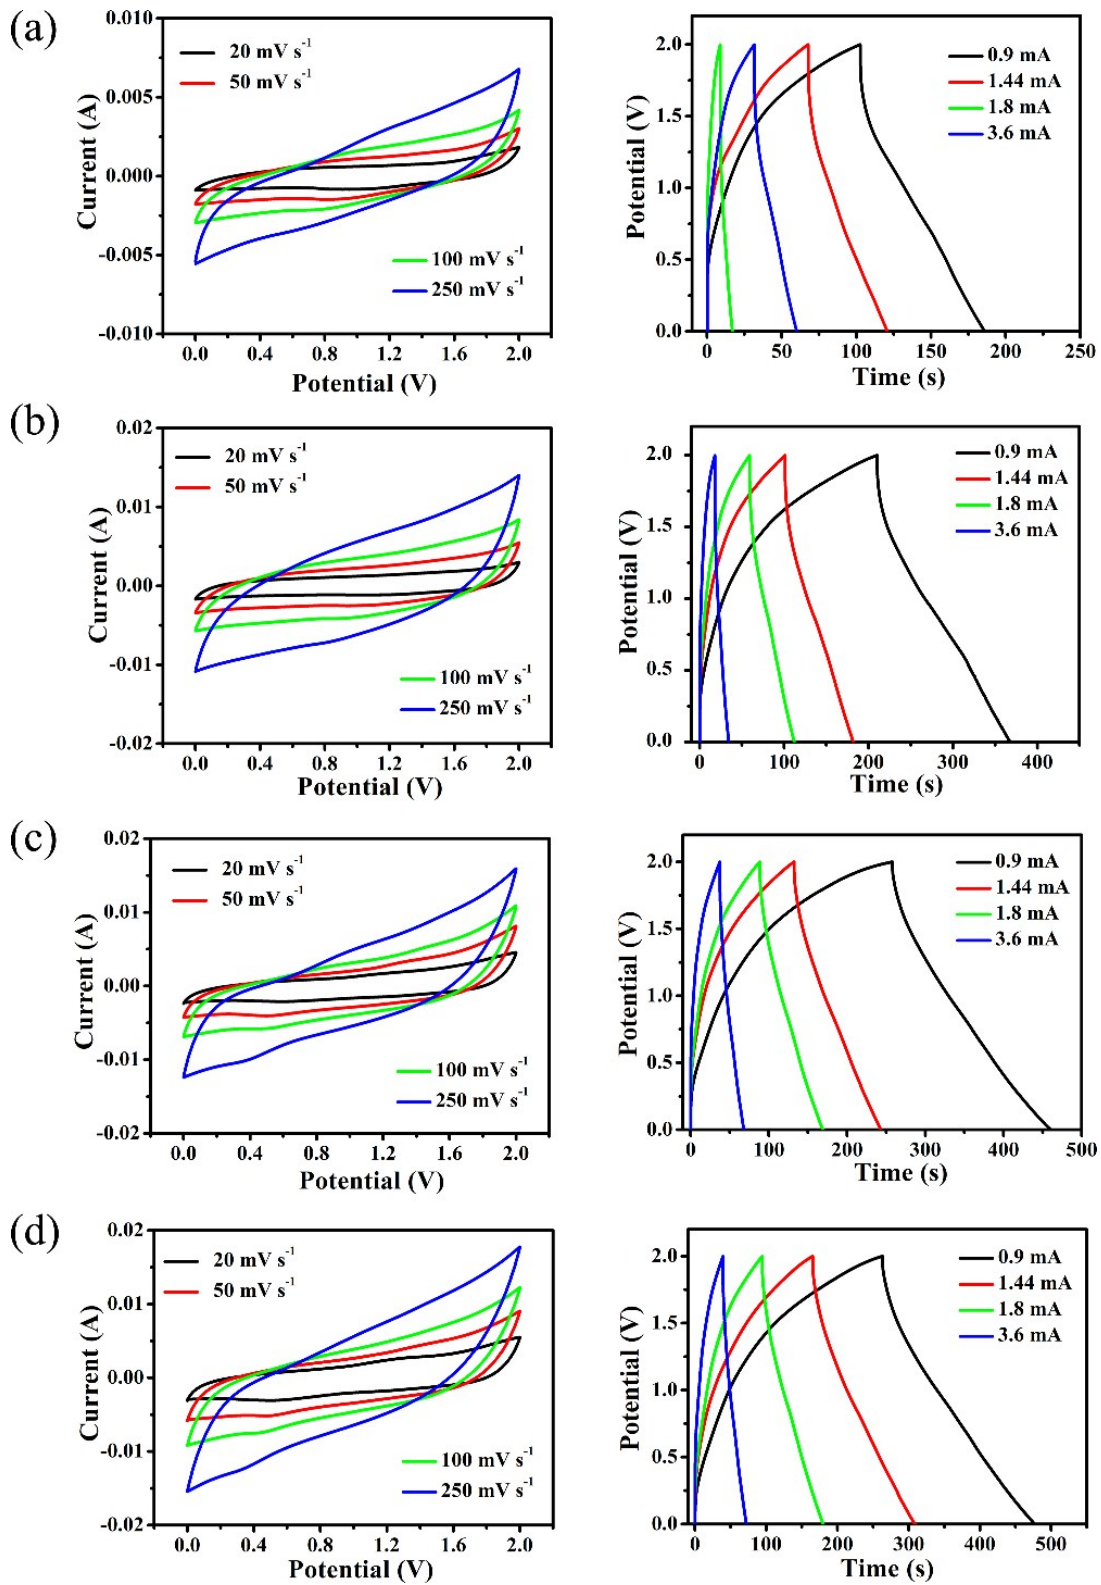

Figure S4 CV and GCD curves of the fiber-shaped asymmetric supercapacitors with different negative/positive (1.27 mg) mass ratios. (a) 0.57, (b) 0.88, (c) 1.52, and (d) 1.87.

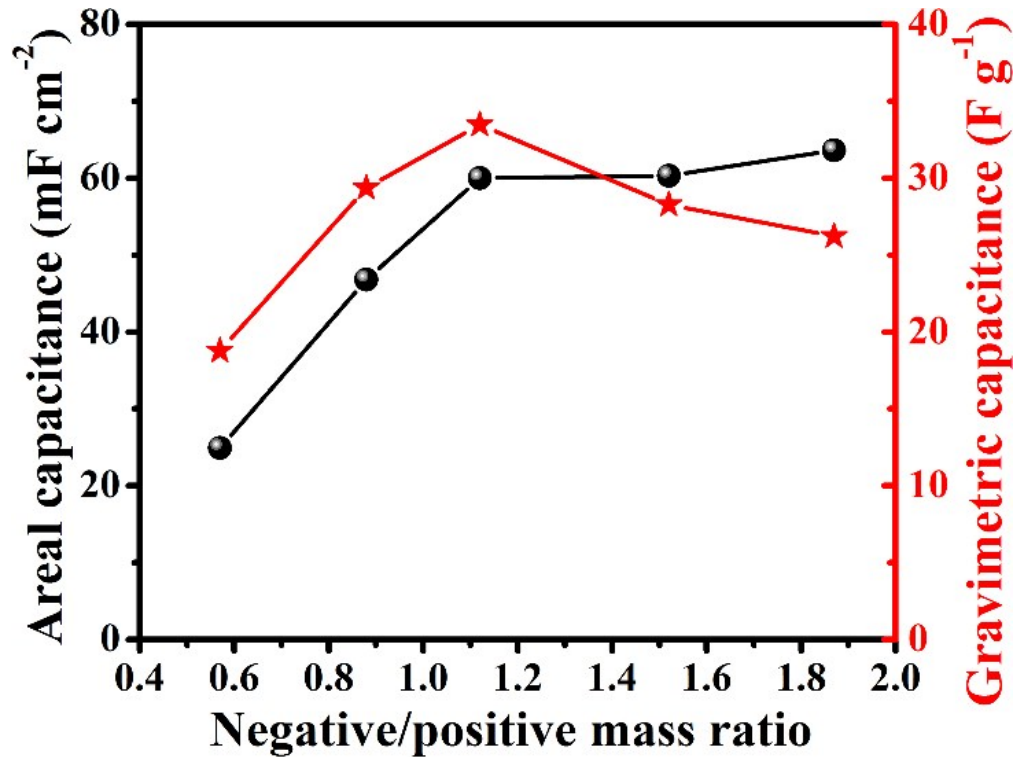

Figure S5 The corresponding areal and gravimetric capacitances of the fiber-shaped ASCs calculated from GCD curves at 0.9 mA as a function of negative/positive mass ratio.

According to the charge-balance equation:  $q^- = q^+$ , the theoretical optimal mass ratio between the positive and negative electrode should be  $m_n/m_p = 1.4:1$ . In order to determine the optimal  $m_n/m_p$  mass ratio, ASCs were fabricated by using different negative/positive mass ratios, 0.57, 0.88, 1.12, 1.52 and 1.87. Corresponding capacitances of 24.9, 46.8, 60, 60.3 and 63.6 mF cm<sup>-2</sup> (18.77, 29.37, 33.46, 28.27 and 26.21 F g<sup>-1</sup>) were obtained. It was clearly that the areal and gravimetric capacitance value of ASCs increase rapidly as the negative/positive mass ratio increases up to 1.12. Further increasing the as the negative/positive mass ratio, the areal capacitance values of ASCs increase slightly, but the

gravimetric capacitance decrease. The optimal negative/positive mass ratio (1.12) from experimental results is slightly less than the theoretical value of 1.4. This result is similar to previous reported works which suggested that the maximum electrochemical value for ASCs was obtained at a low positive/negative mass ratio (less than the q balance value) [1-4].

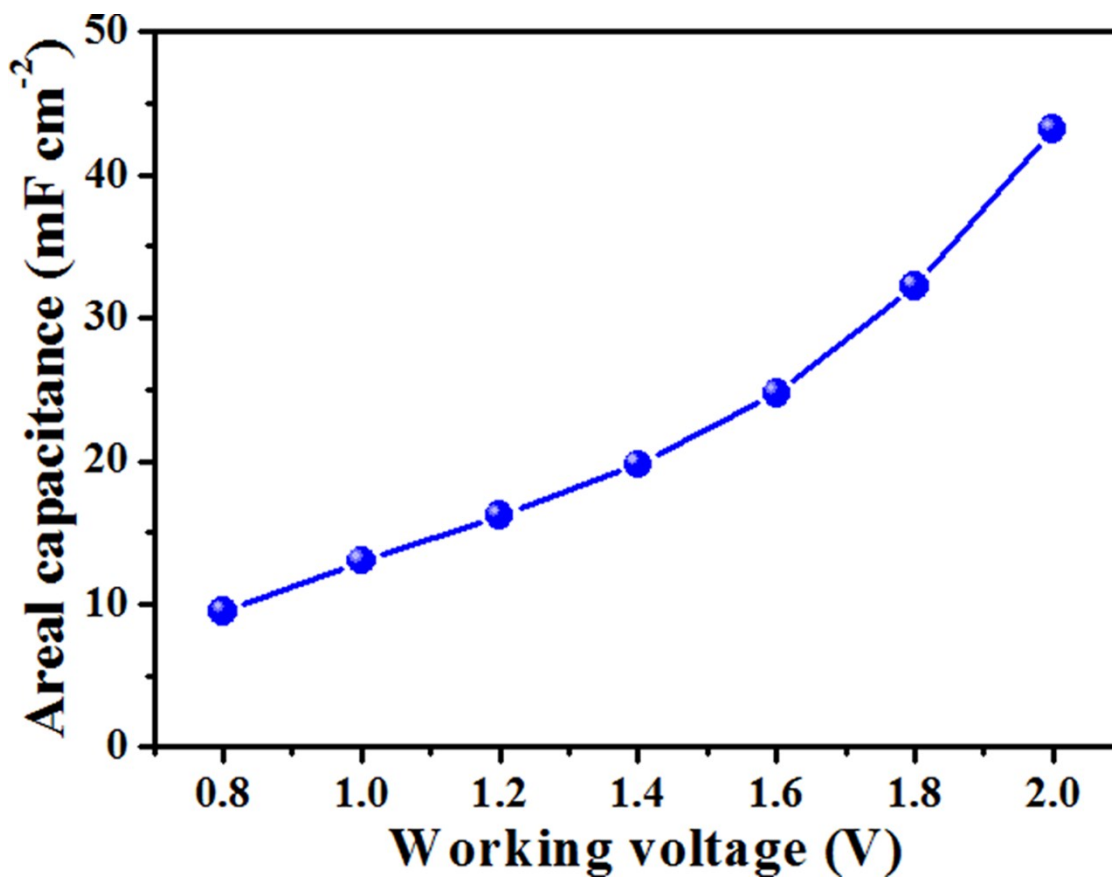

Figure S6 Specific capacitance of the fabricated ASC as a function of voltage window.

#### References

1. R. Wang, X. Yan, J. Lang, Z. Zheng, P. Zhang, *J. Mater. Chem. A*, 2014, 2, 12724-12732.
2. 37 J. P. Zheng, *J. Electrochem. Soc.*, 2003, 150, A484-A492.
3. 38 J. P. Zheng, *J. Electrochem. Soc.*, 2009, 156, A500-A505.
4. 39 G. A. Snook, G. J. Wilson and A. G. Pandolfo, *J. Power Sources*, 2009, 186, 216-223.
